# Supplementary material for: Human endonuclease V is a ribonuclease specific for inosine-containing RNA
Source: PubMed Central journal article supplement (PMC3741642; doi:10.1038/ncomms3273), 2013-08-05
Supplement: ncomms3273-s1.pdf [file ncomms3273-s1.pdf]

Supplementary Information

**Human endonuclease V is a ribonuclease specific for inosine-containing RNA**

Yoko Morita<sup>1</sup>, Toshihiro Shibutani<sup>1</sup>, Nozomi Nakanishi<sup>1</sup>, Kazuko Nishikura<sup>2</sup>, Shigenori

Iwai<sup>1</sup>, Isao Kuraoka<sup>1\*</sup>

<sup>1</sup>Graduate School of Engineering Science, Osaka University, 1-3 Machikaneyama,

Toyonaka, Osaka 560-8531, Japan. <sup>2</sup>The Wistar Institute, 3601 Spruce Street,

Philadelphia, PA 19104, USA.

**\*Corresponding author:** Isao Kuraoka, Graduate School of Engineering Science,

Osaka University, 1-3 Machikaneyama, Toyonaka, Osaka 560-8531, Japan. Tel:

+81-6-6850-6240, Fax: +81-6-6850-6240, E-mail: kuraoka@chem.es.osaka-u.ac.jp

**Short Title:** hEndoV as an I-RNase

**Keywords:** Deamination, DNA repair enzyme, ribonuclease, RNA editing

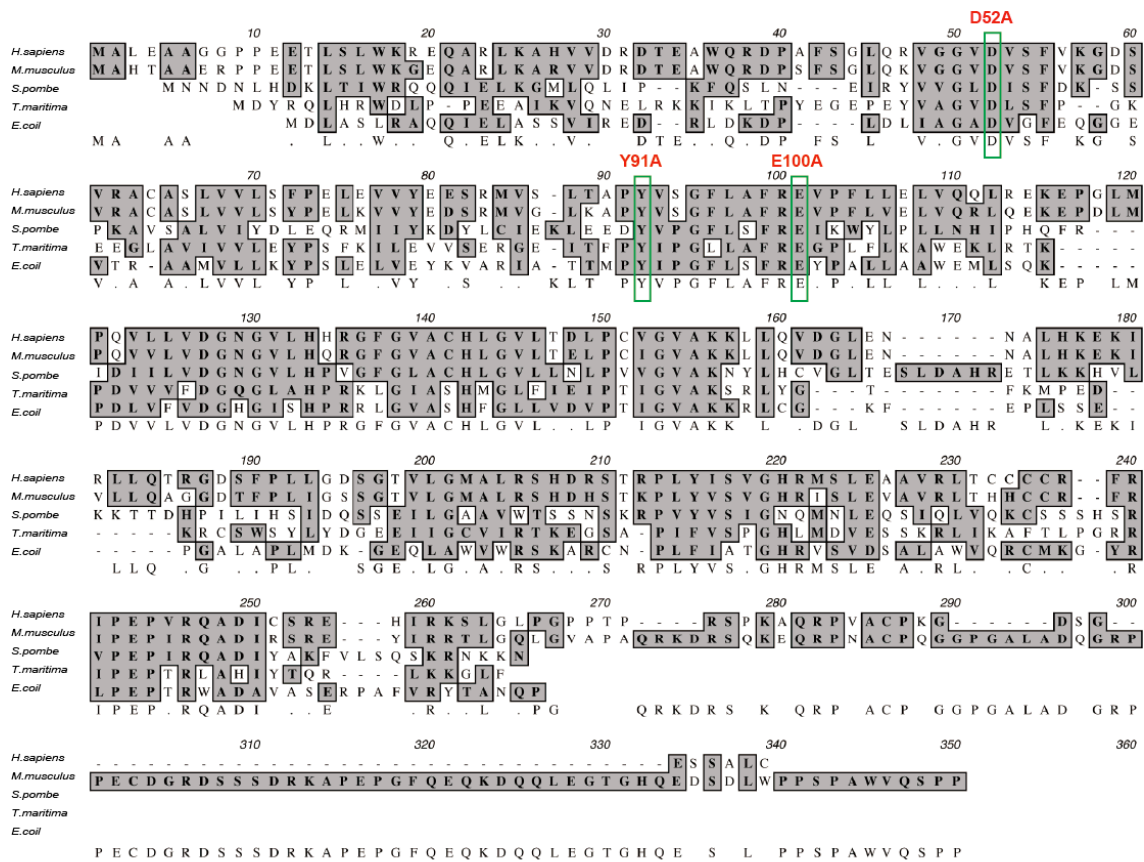

Supplementary Fig. S1

**Supplementary Fig. S1. Human endonuclease V (hEndoV).**

Alignment of the representative amino acid sequences of EndoV from *Escherichia coli* (NP\_290630), *Thermotoga maritima* (NP\_229661), *Schizosaccharomyces pombe* (NP\_594332), *Mus musculus* (NP\_001158108), and humans (NP\_775898). Identical and similar residues among the enzymes are indicated in gray.

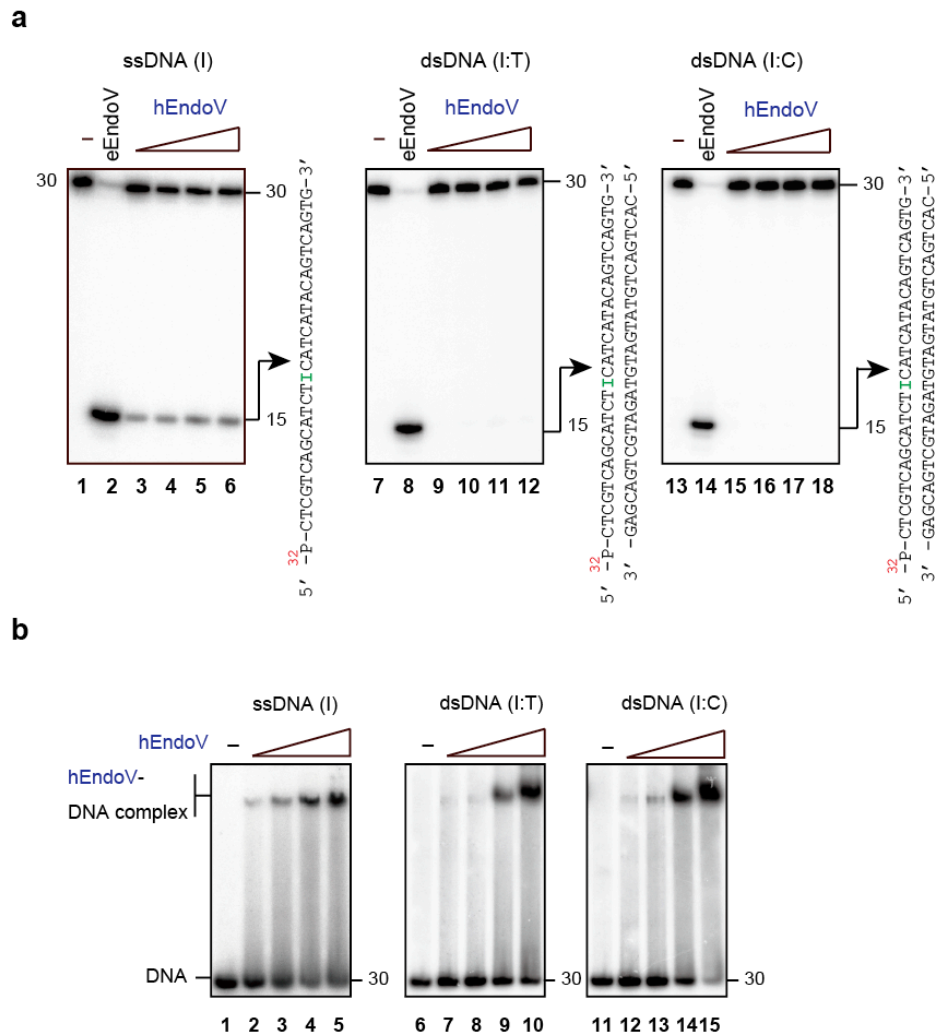

**Supplementary Fig. S2**

**Supplementary Fig. S2.** Properties of hEndoV with respect to inosine-containing DNA. (a) <sup>32</sup>P-labeled 30-mer ssDNA containing deoxyinosine (lanes 1–6), <sup>32</sup>P-labeled 30-mer dsDNA containing deoxyinosine paired with deoxythymidine (lanes 7–12), or <sup>32</sup>P-labeled 30-mer dsDNA containing deoxyinosine paired with deoxycytidine (lanes 13–18) was incubated with increasing concentrations of hEndoV (0.125, 0.25, 0.5, and 1.0 μM in each group of 4 lanes) or eEndoV (5 nM). A 30-mer ssDNA or dsDNA (right panel in each figure) molecule was cleaved at the indicated positions (arrows, 15-mer). (b) <sup>32</sup>P-labeled 30-mer ssDNA or dsDNA shown in (a) was incubated at 4°C for 30 min with increasing concentrations of hEndoV (0, 12.5, 25, 50, and 100 nM in each group of 5 lanes). Free and bound fractions were separated on a nondenaturing 8% polyacrylamide gel.

a

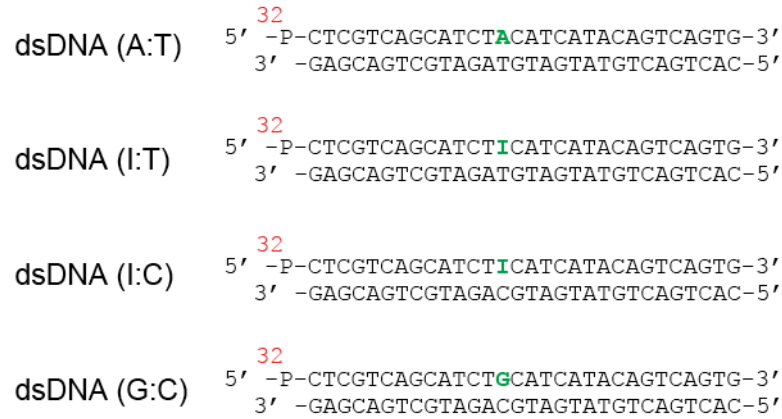

b

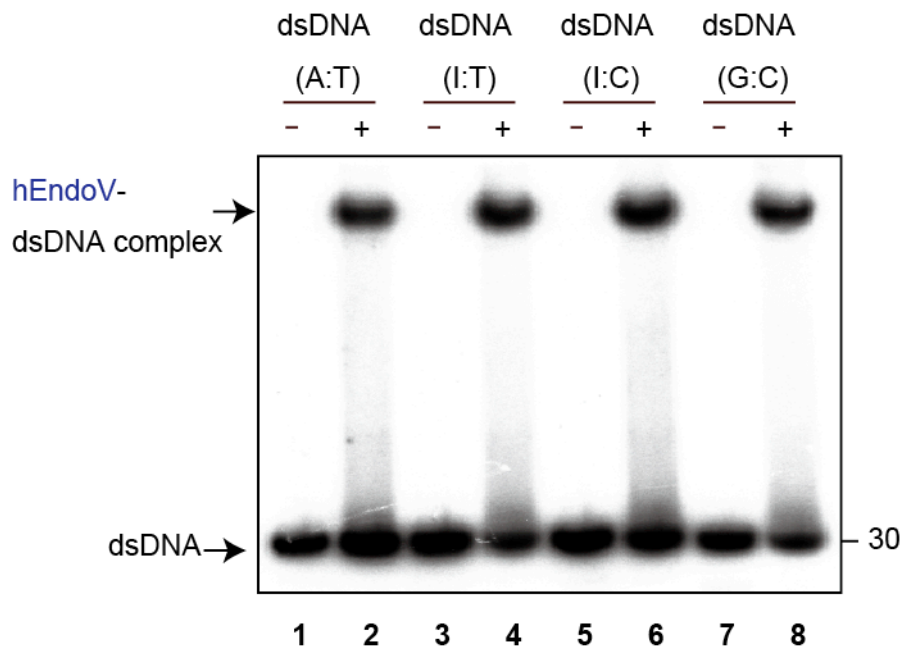

**Supplementary Fig. S3**

**Supplementary Fig. S3.** The binding properties of hEndoV for inosine-containing dsDNA. (a) A series of dsDNA substrates containing deoxyadenosine, deoxyinosine, or deoxyguanosine. (b) The  $^{32}\text{P}$ -labeled 30-mer dsDNA shown in (a) was incubated at 4°C for 30 min with (+) or without (-) 50 nM hEndoV. Free and bound fractions were separated on a nondenaturing 8% polyacrylamide gel.

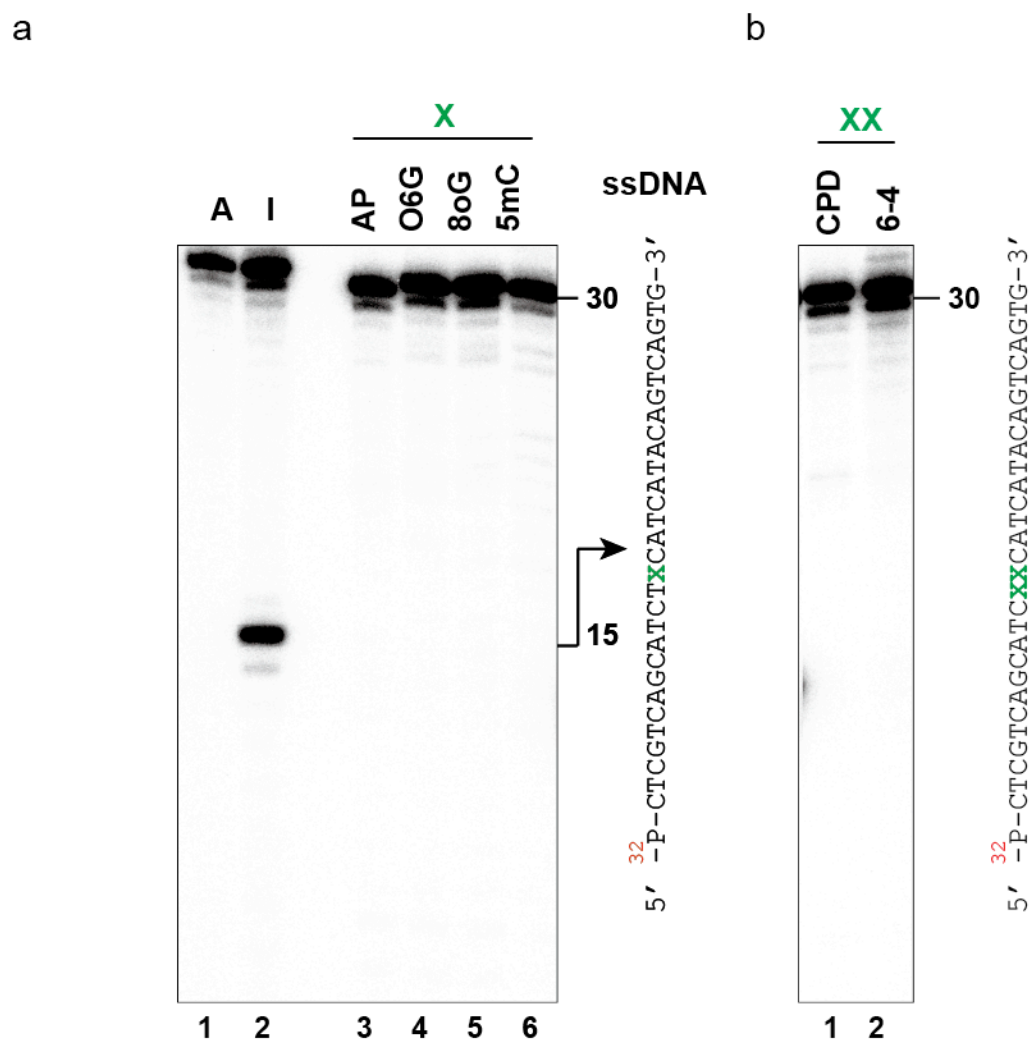

**Supplementary Fig. S4**

**Supplementary Fig. S4.** Properties of hEndoV with respect to inosine-containing DNA. (a)  $^{32}\text{P}$ -labeled 30-mer ssDNA containing deoxyadenosine (lane 1), deoxyinosine (lane 2), AP site (lane 3),  $O^6$ -methyguanine (lane 4), 8-oxoguanine (lane 5), or 5-methylcytosine (lane 6) in position X (*right panel*) was incubated with hEndoV (1  $\mu\text{M}$ ). A 30-mer ssDNA (*right panel*) was cleaved at the indicated positions (arrows, 15-mer). (b)  $^{32}\text{P}$ -labeled 30-mer ssDNA containing *cis*-syn cyclobutane pyrimidine dimers (lane 1) or pyrimidine (6-4) pyrimidone photoproducts (lane 2) in position XX (*right panel*) was incubated with hEndoV (1  $\mu\text{M}$ ).

a

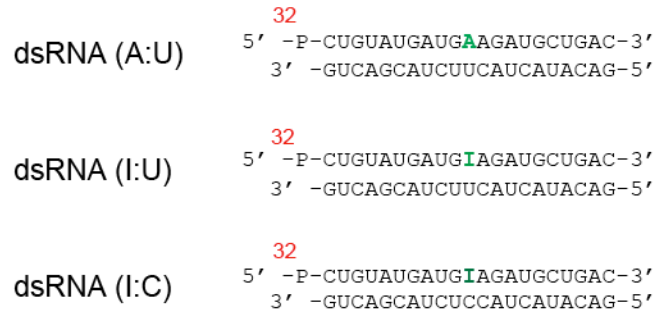

b

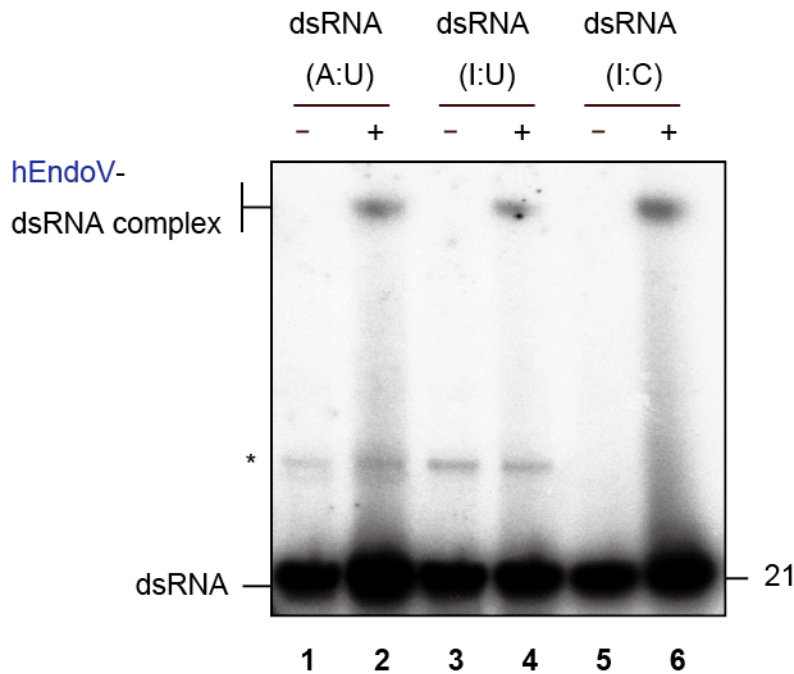

### Supplementary Fig. S5

**Supplementary Fig. S5.** Binding properties of hEndoV for inosine-containing dsRNA. (a) A series of RNA substrates containing adenine or inosine in dsRNA. (b) <sup>32</sup>P-labeled 21-mer dsRNA shown in (a) was incubated at 4°C for 30 min with (+) or without (-) hEndoV (20 nM). The band indicated with an asterisk is a nonspecific band. Free and bound fractions were separated on a nondenaturing 8% polyacrylamide gel.

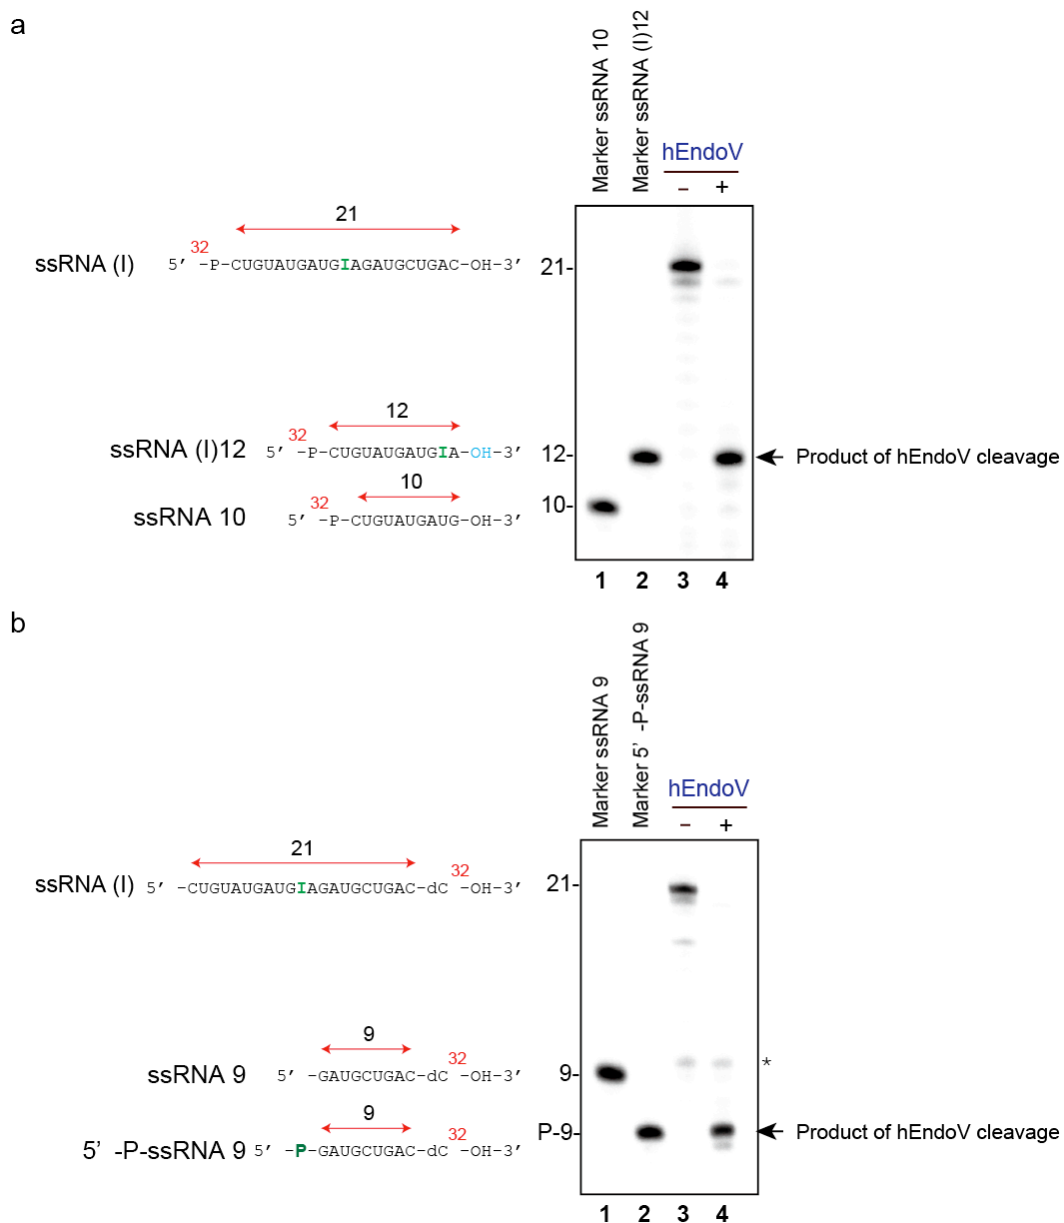

**Supplementary Fig. S6.** The nuclease properties of hEndoV for inosine-containing ssRNA. (a) 5'-<sup>32</sup>P-labeled 21-mer ssRNA containing inosine was incubated at 37°C for 30 min without (-) or with (+) 20 nM hEndoV (lanes 3 and 4). Size markers, 5'-<sup>32</sup>P-labeled ssRNA 10-mer oligo (lane 1) and 5'-P-labeled ssRNA 12-mer oligo containing inosine (lane 2). (b) 3'-<sup>32</sup>P-labeled 21-mer ssRNA containing inosine was incubated at 37°C for 30 min without (-) or with (+) 20 nM hEndoV (lanes 3 and 4). Size markers, 3'-<sup>32</sup>P-labeled ssRNA oligo 9-mer (lane 1) and 3'-P-labeled ssRNA oligo 9-mer containing phosphate at the 5' position (lane 2). The band indicated with an asterisk is a nonspecific band. Fragments were separated on a 15% denaturing polyacrylamide gel.

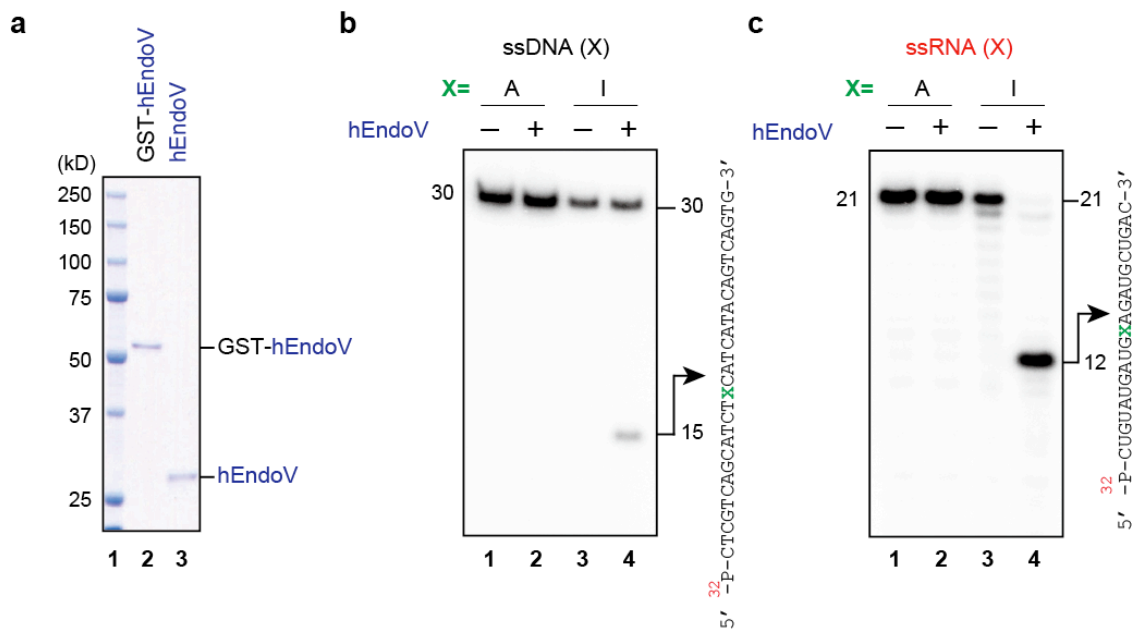

**Supplementary Fig. S7**

**Supplementary Fig. S7.** Nuclease properties of hEndoV without GST-tag.

(a) Purified proteins were subjected to SDS-PAGE on 10% gels, and the proteins were visualized by staining with CBB. Lane 1, marker; lane 2, GST-hEndoV; lane 3, hEndoV. (b) 5'-<sup>32</sup>P-labeled 30-mer ssDNA containing deoxyadenine or deoxyinosine was incubated at 37°C for 30 min without (-, lanes 1 and 3) or with (+, lanes 2 and 4) 300 nM hEndoV. (c) 5'-<sup>32</sup>P-labeled 21-mer ssRNA containing adenine or inosine was incubated at 37°C for 30 min without (-, lanes 1 and 3) or with (+, lanes 2 and 4) 30 nM hEndoV.
